# Supplementary material
Source: PubMed Central journal article supplement (PMC4415615)

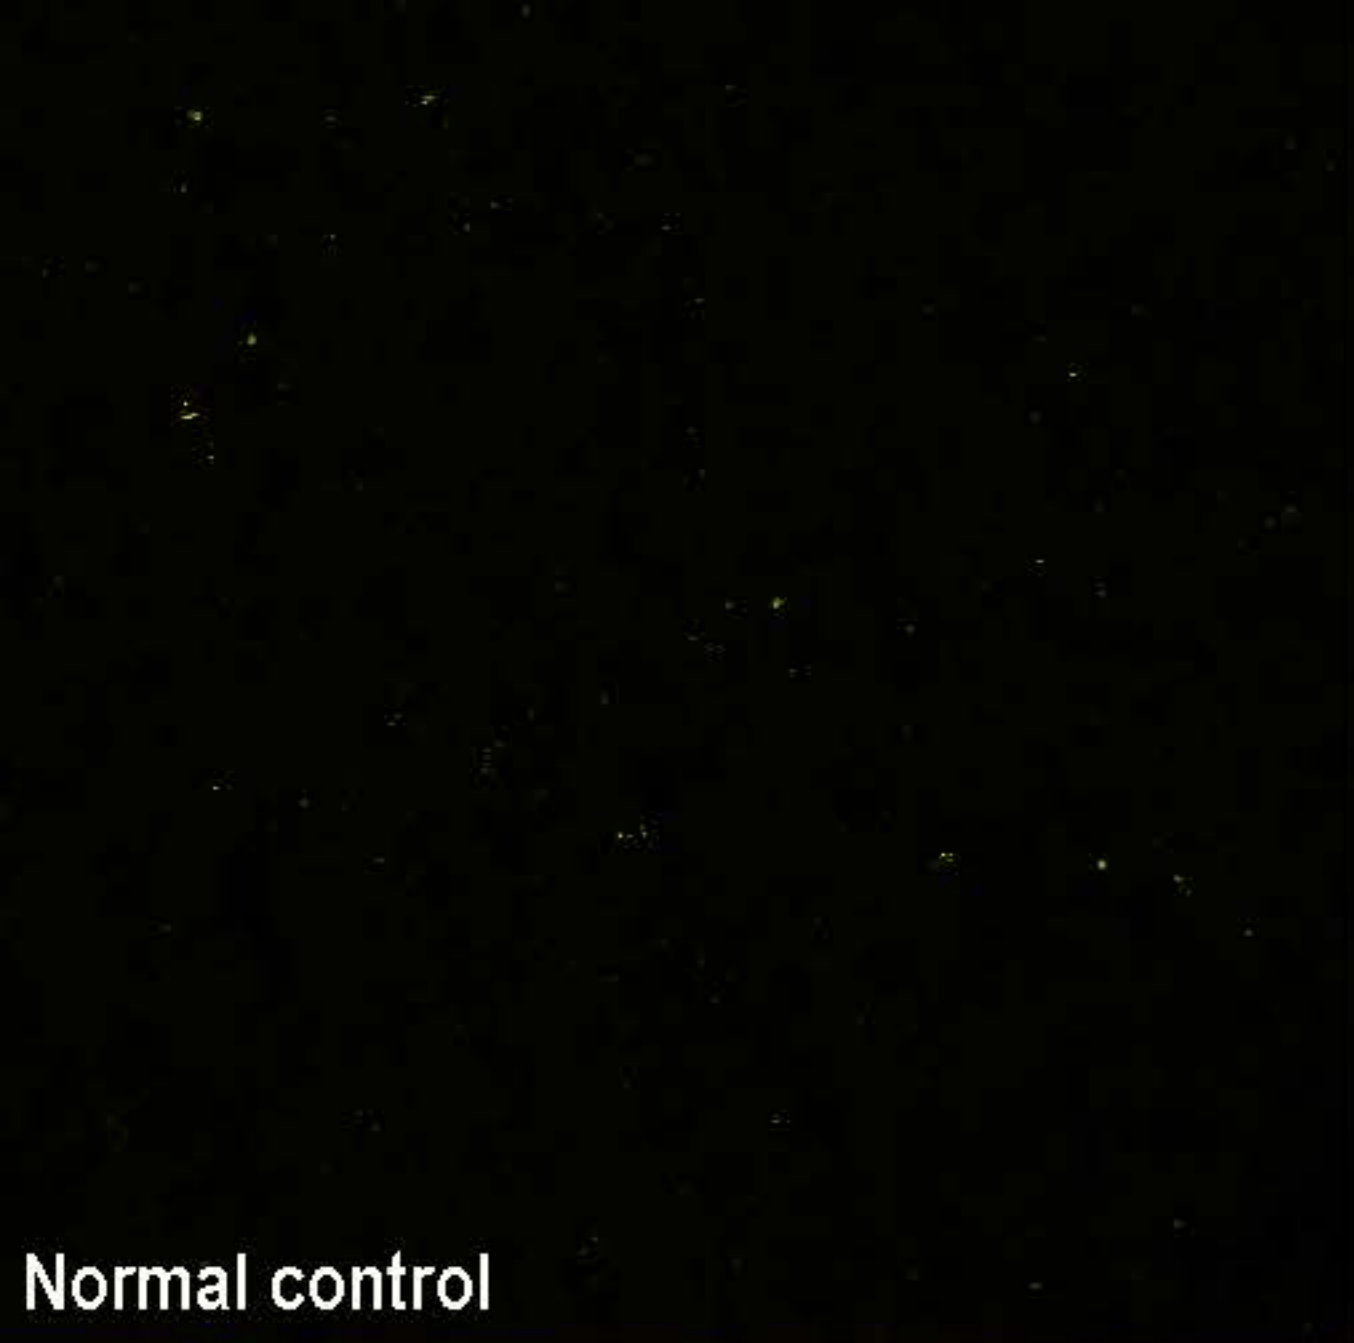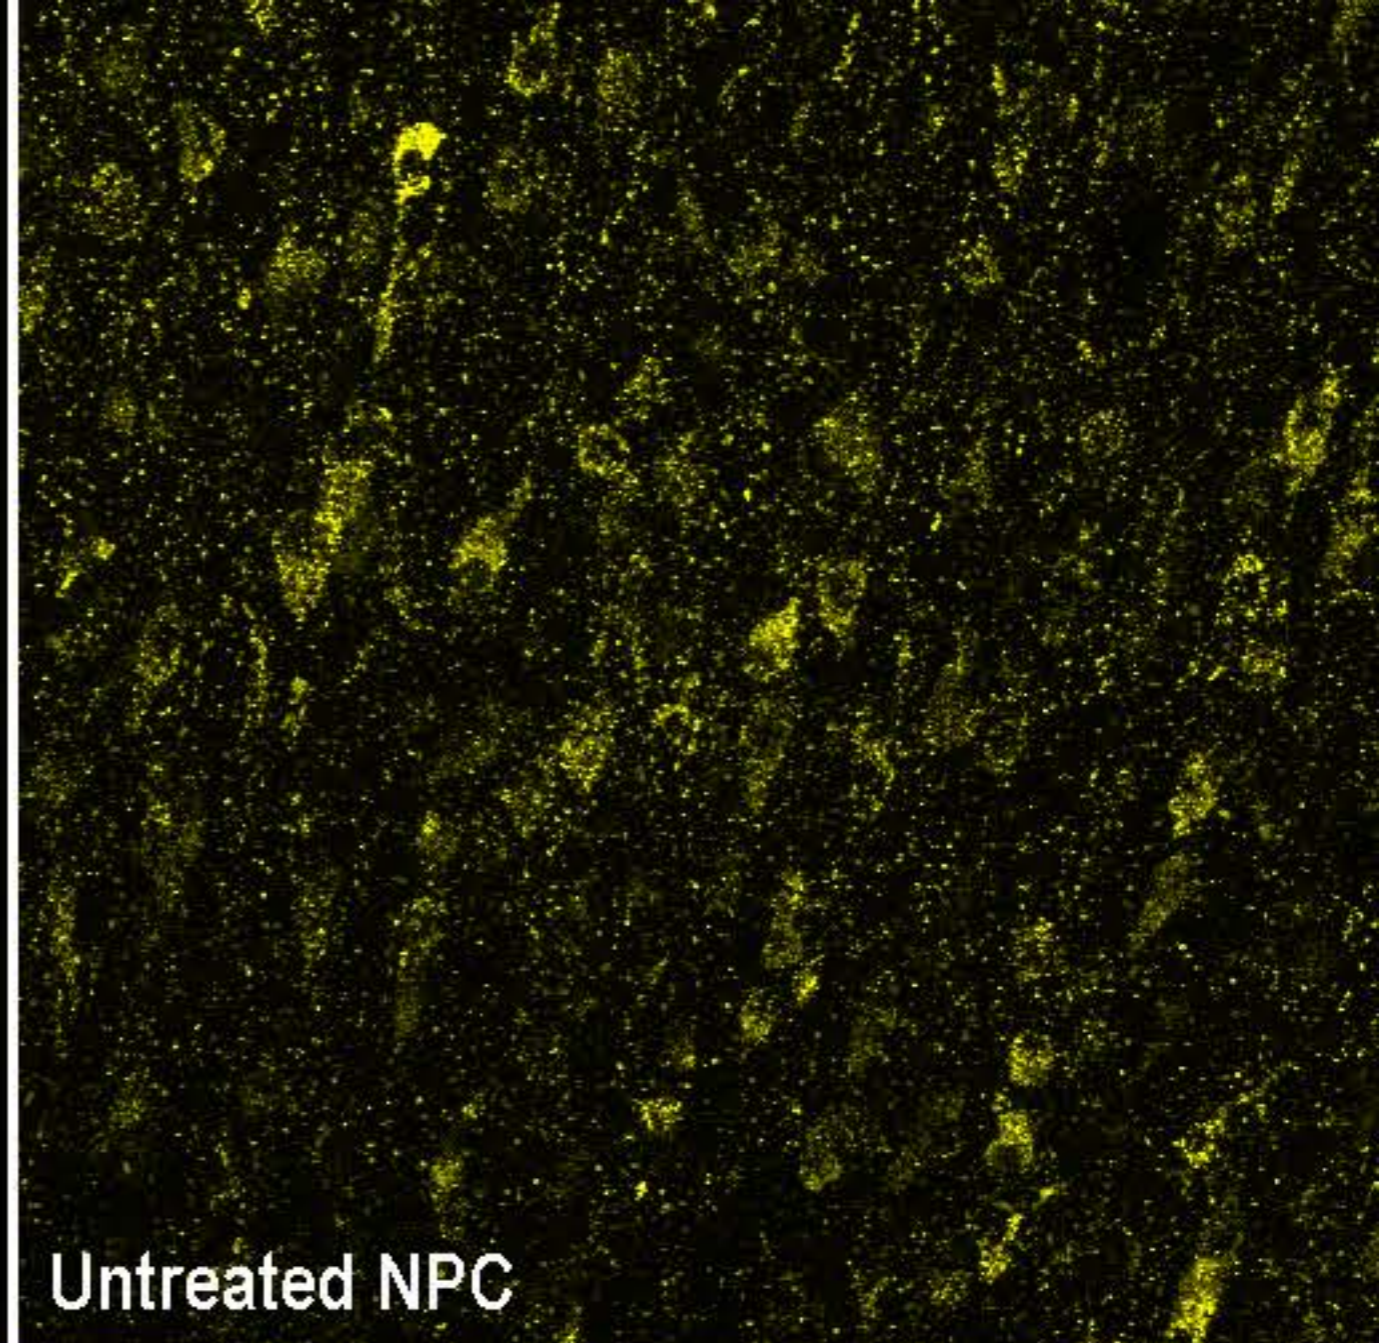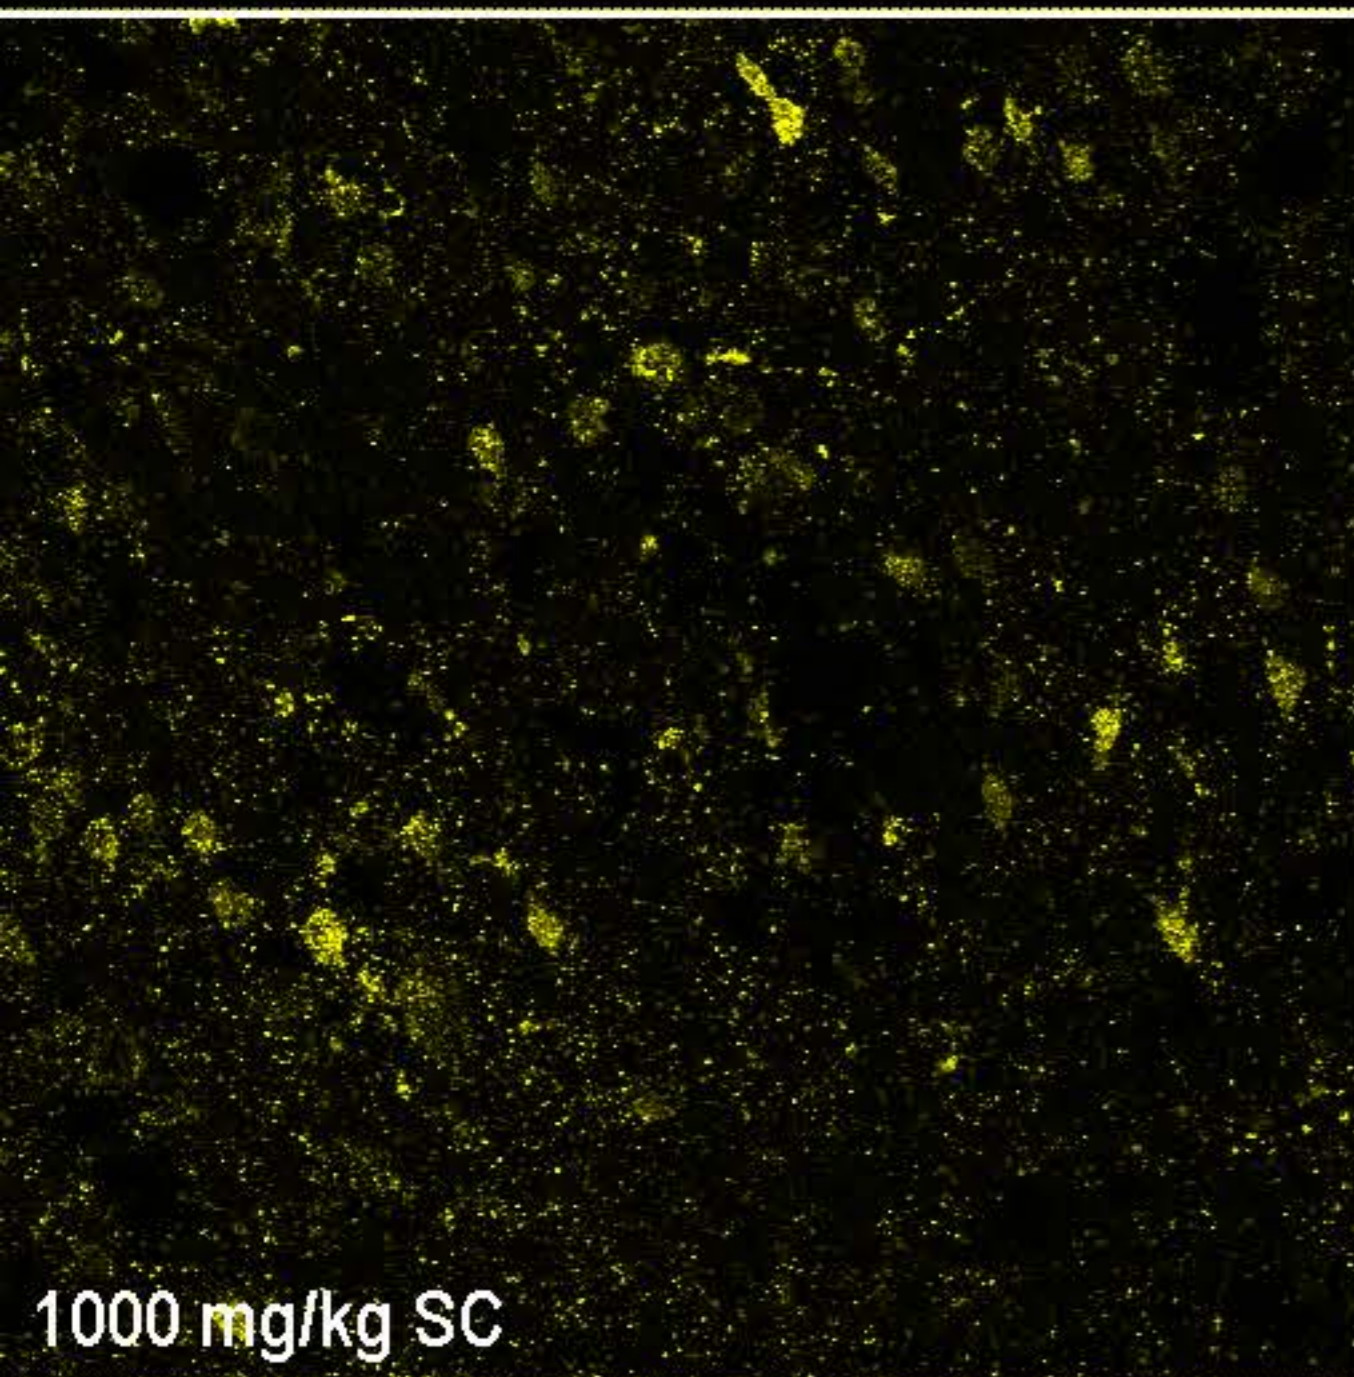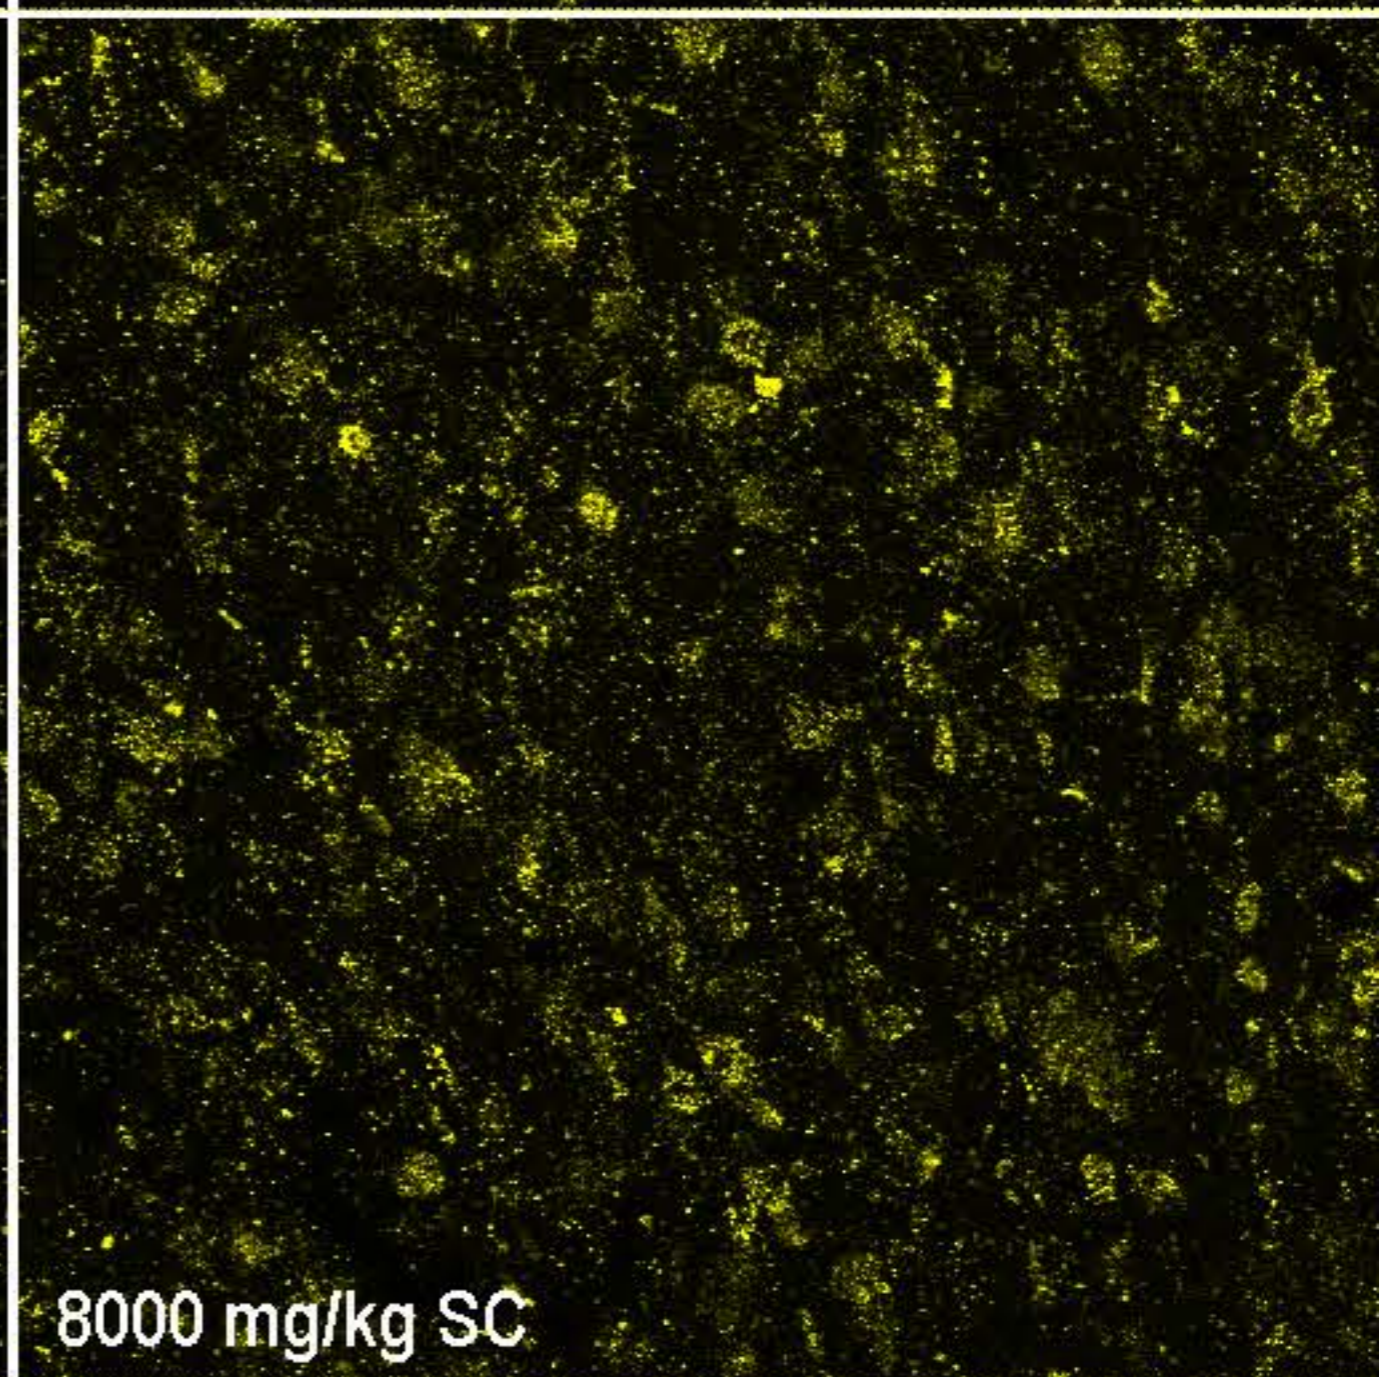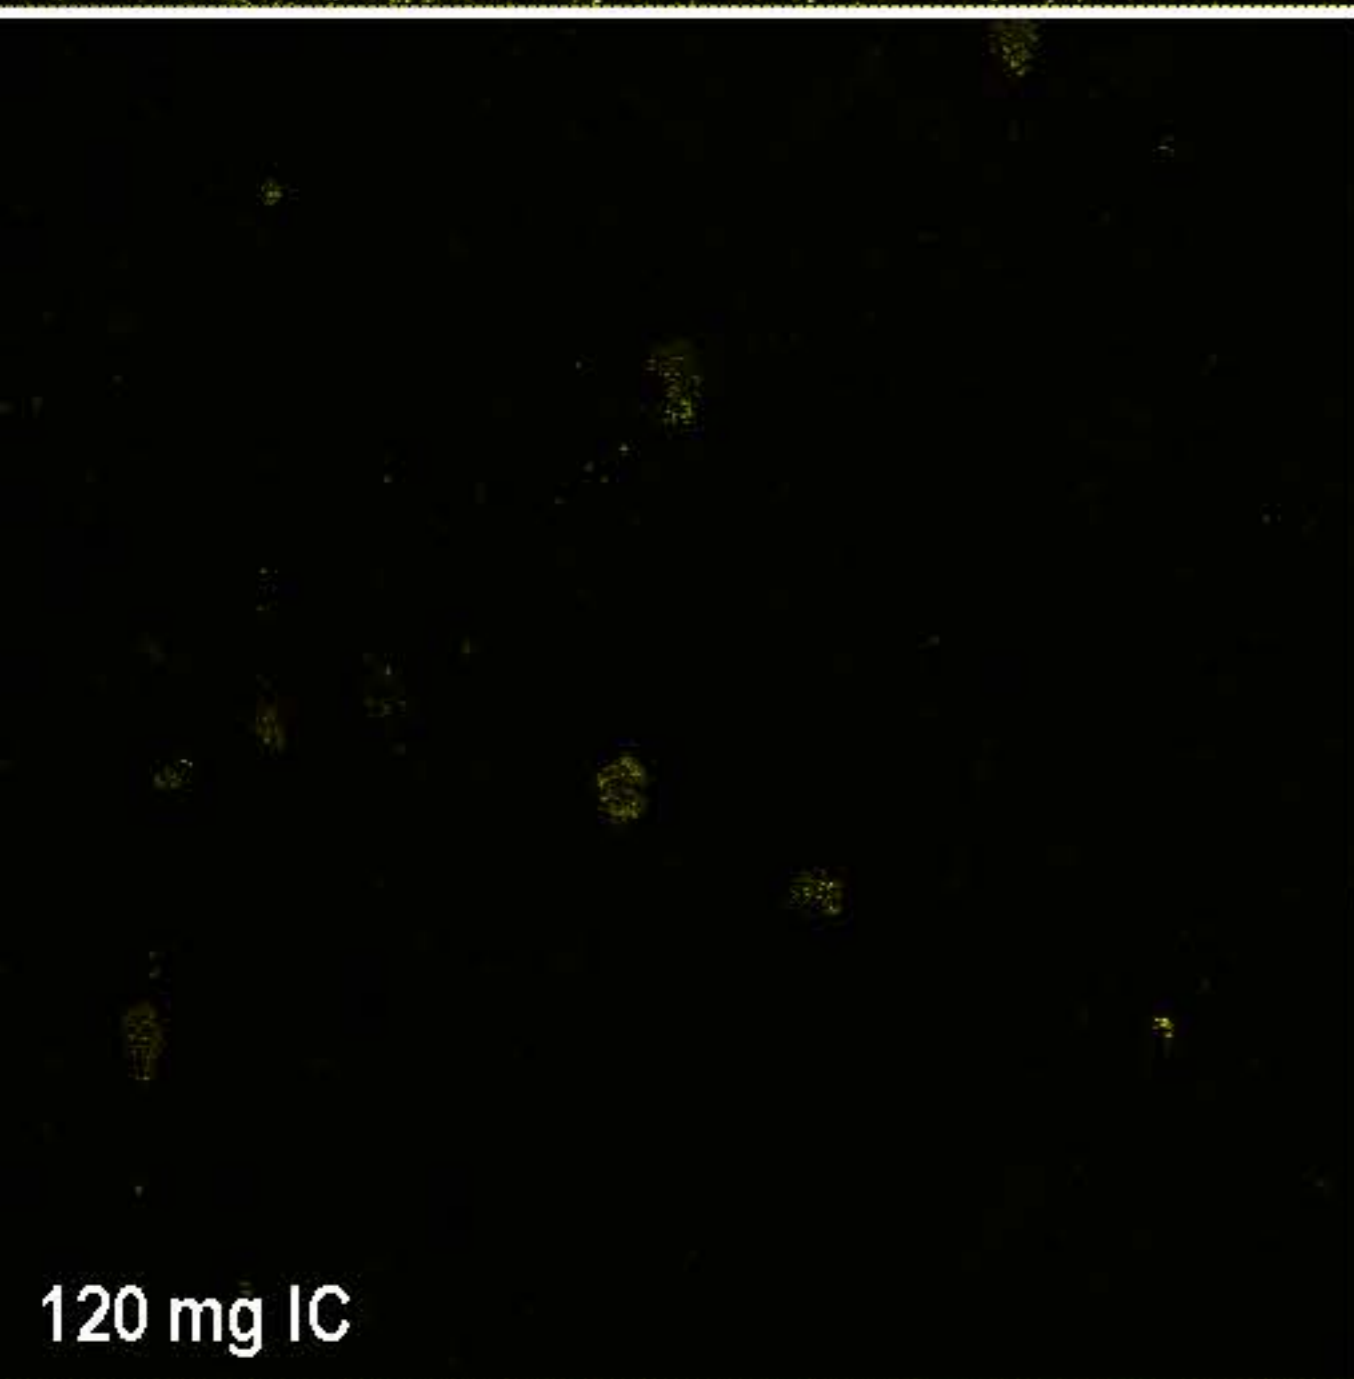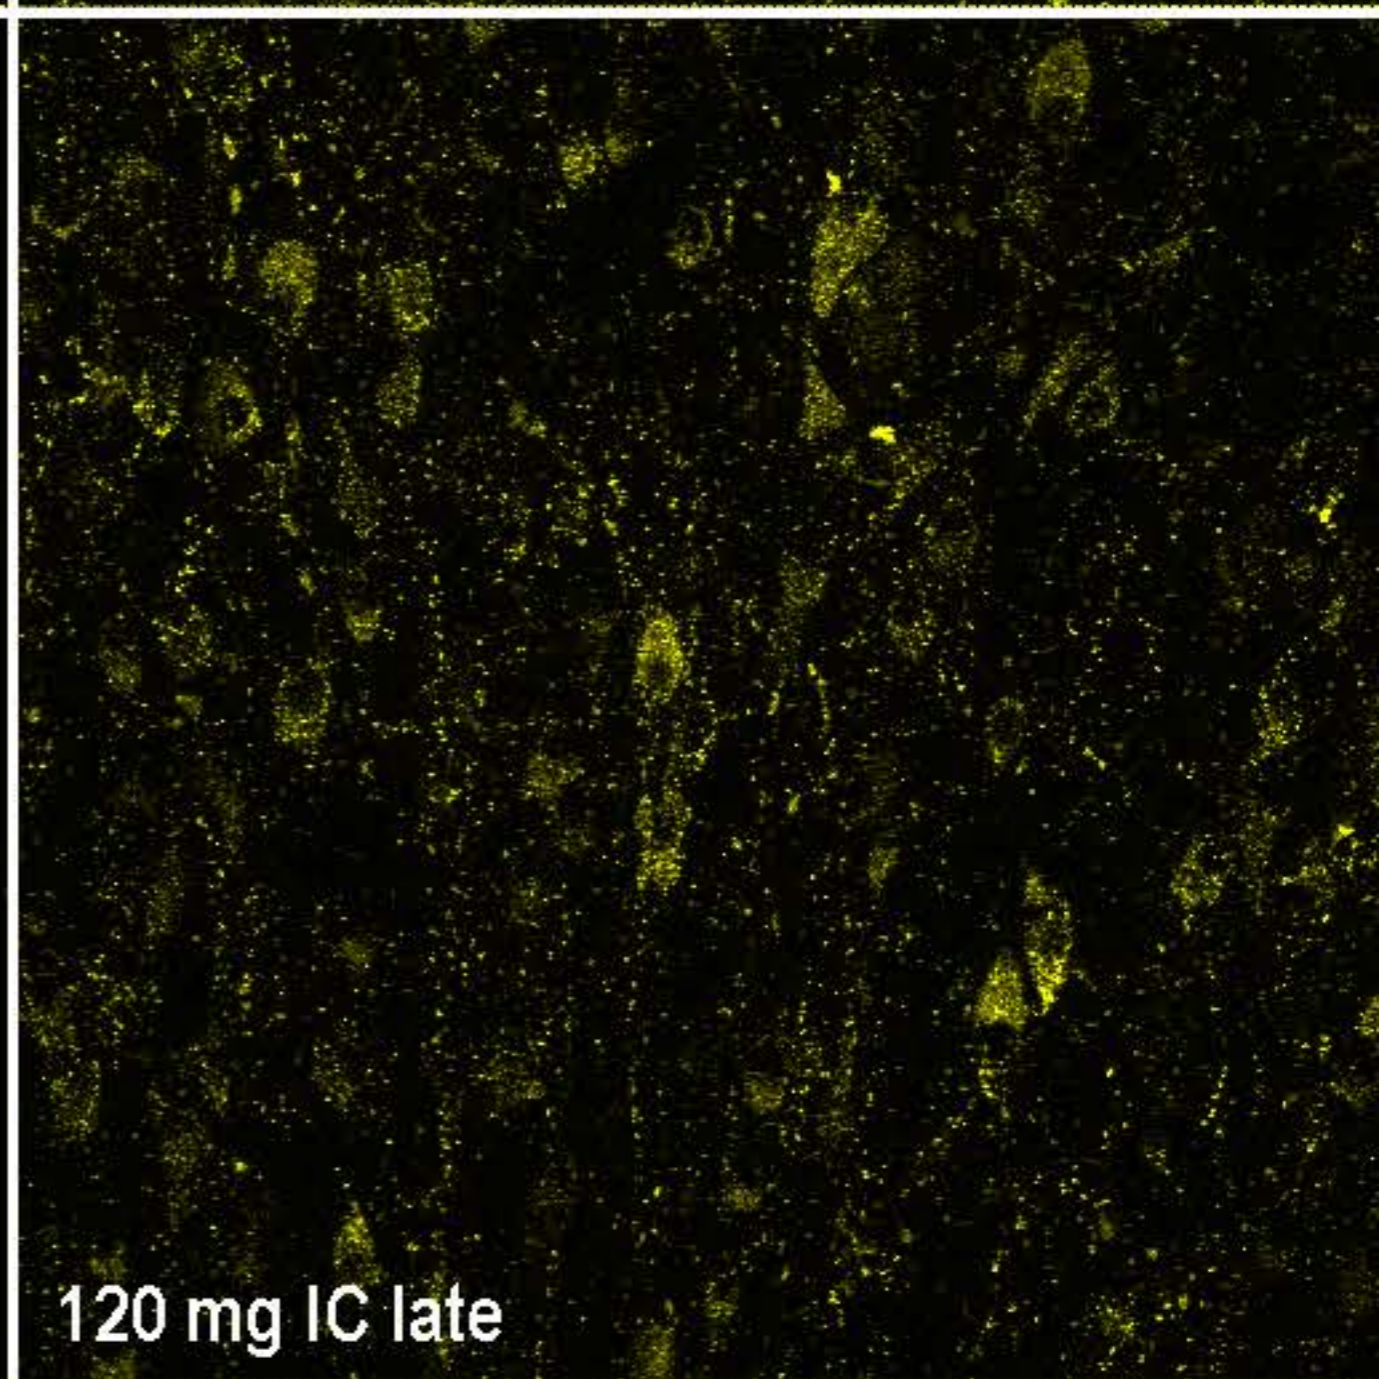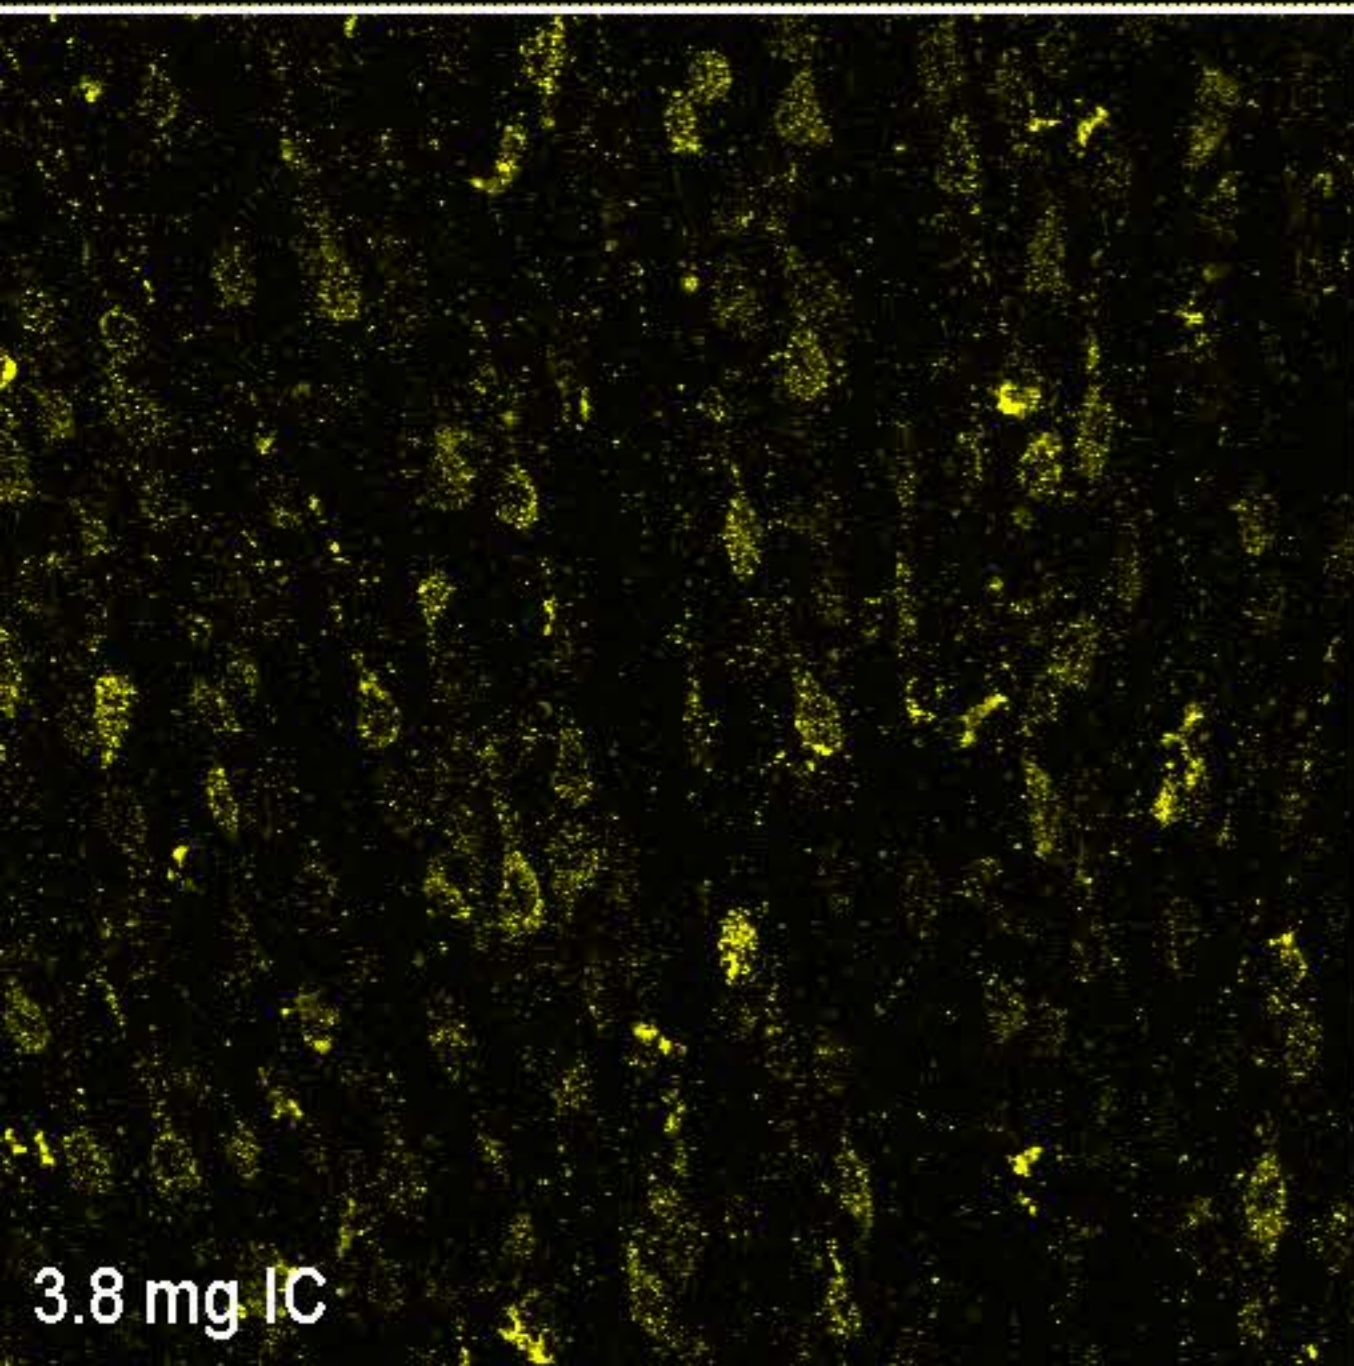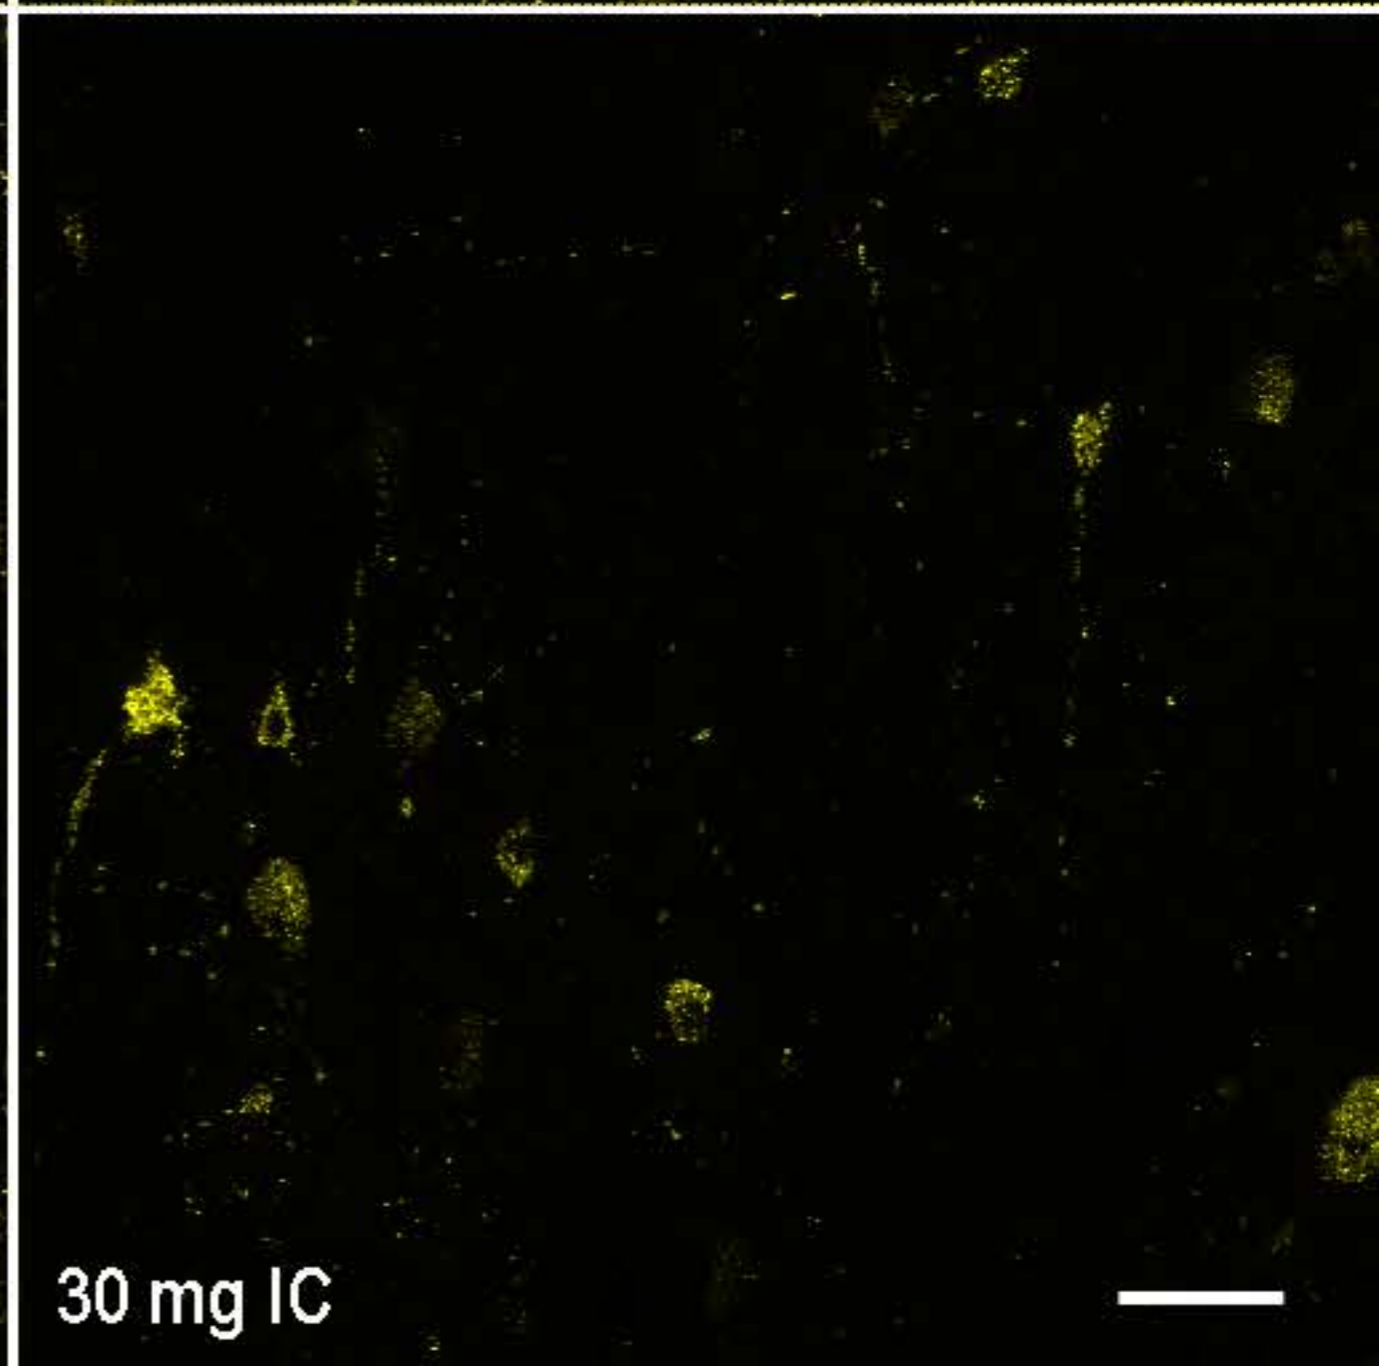

Supplement: NIHMS679887-supplement-Supp__Fig__3.pdf [file NIHMS679887-supplement-Supp__Fig__3.pdf]
